# Supplementary material for: Persons with Epilepsy: Between Social Inclusion and Marginalisation
Source: Hindawi journal article supplement (doi:10.1155/2016/2018509), 2016-01-01

## Appendix 1: Epilepsy characteristics and consequences

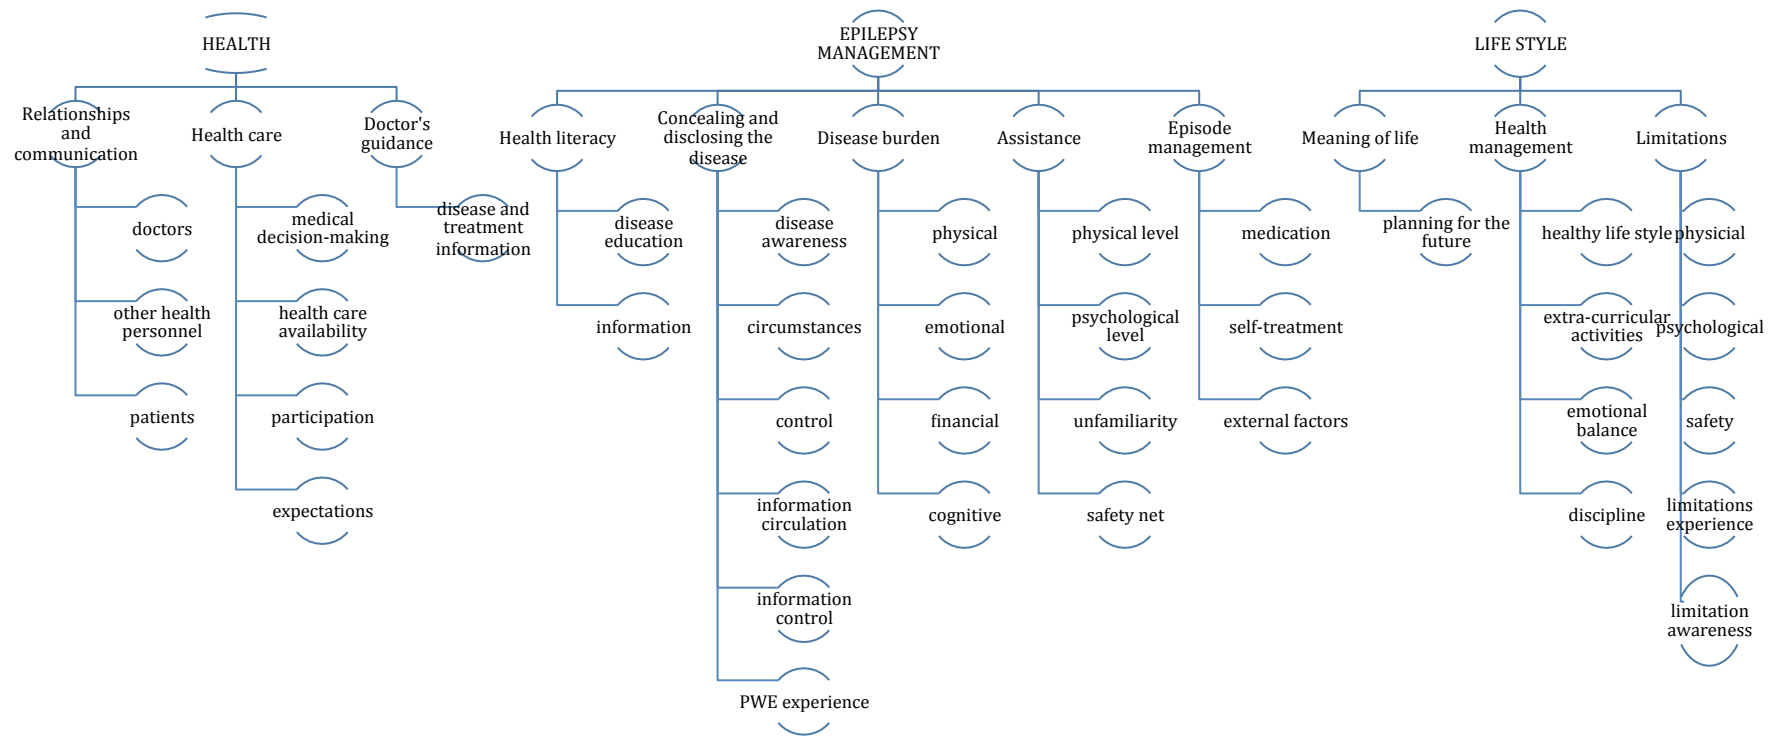

Appendix 2: PWE Social contacts and relationships

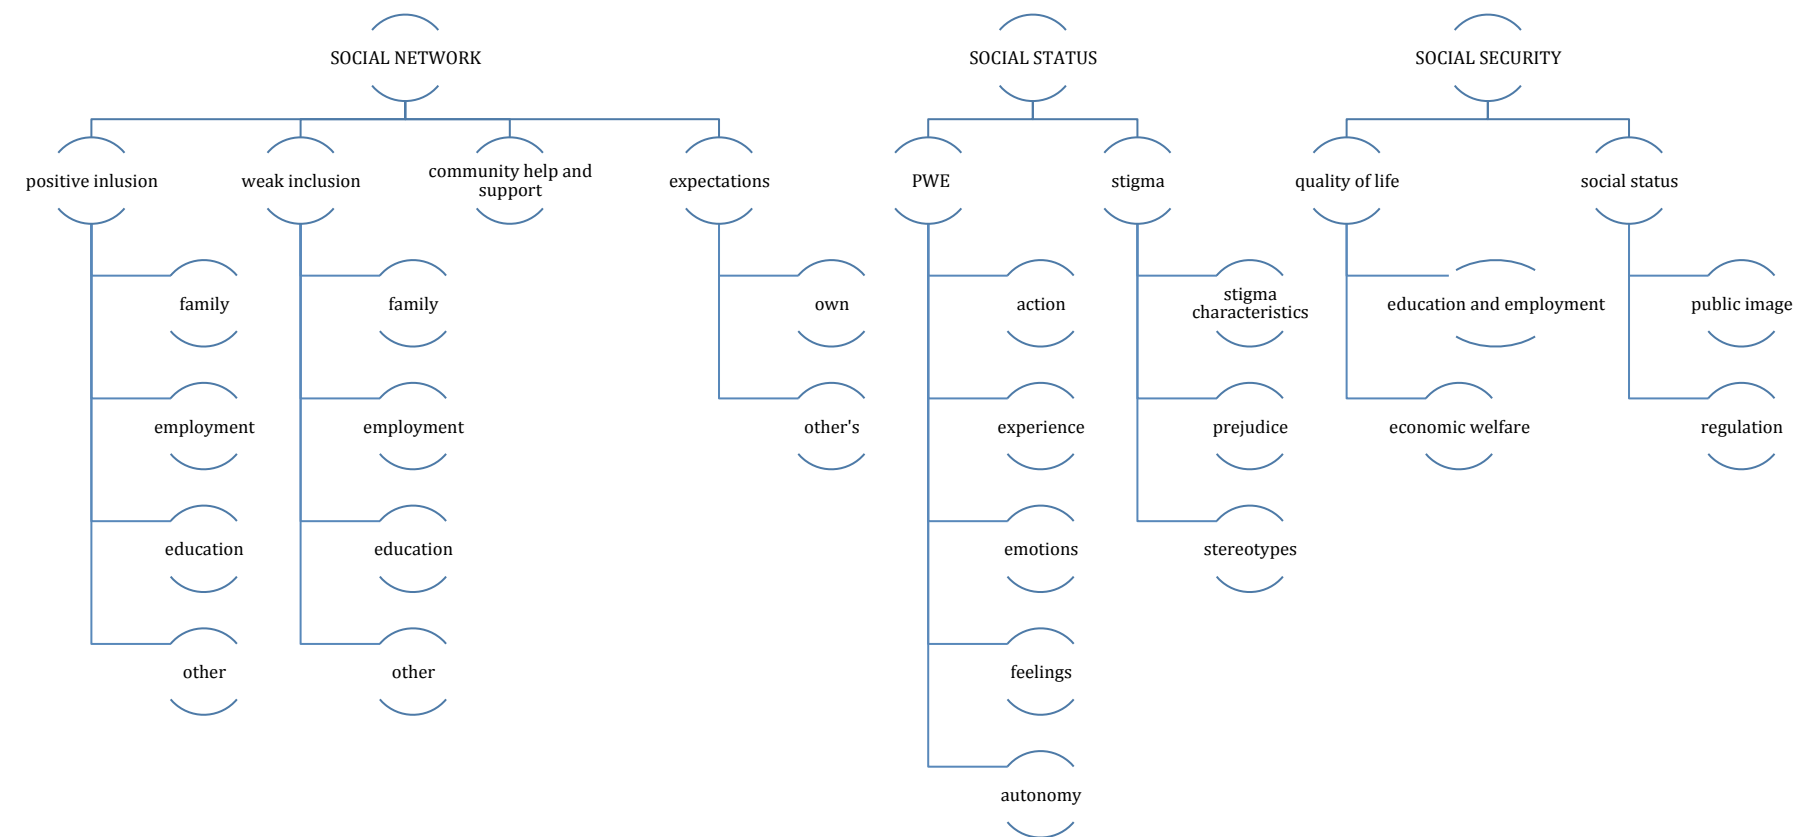

Supplement: f1 [file 2018509.f1.pdf]
